# Supplementary material for: Rapid and Easy-Read Porcine Circovirus Type 4 Detection with CRISPR–Cas13a-Based Lateral Flow Strip
Source: MDPI journal article supplement (doi:10.3390/microorganisms11020354), 2023-01-31
Supplement: s1 [file s1]

## *Supplementary Material*

### **1     Supplementary Data 1.**

The conserved nucleotide region of the PCV4 Cap gene:

5'TTTGGAGTGAAATAGCGACTGTGTCTAGCAATATTGGTGAAACCATGCCTGCTGCTGT  
GGTTTGCCAGGACATCATAAGTTTGGTTTTTCCCTTCCCCCACATAGTCTCCATCCAGTTG  
TATAGCAGTGCTAGAGTAAGTCCTATTACTGTTAATGCCATTTAGTGGCAGAAATTCGAC  
TTTGACCTTTCTGATCCGGTAATATGCAAATGGGAGGCTGTAAAGGTTTACGATCGTTCC  
CGGTCCTTTTGGGATAAAGTCCTTCAGTTTGAAATCGTAATGTCCAACGTTCCAAGAGGG  
CGTGGAAA-3'
